# Supplementary material for: Photonic and magnetic dual responsive molecularly imprinted polymers: preparation, recognition characteristics and properties as a novel sorbent for caffeine in complicated samples
Source: Royal Society of Chemistry journal article supplement (doi:10.1039/c2ay25922b), 2012-11-17
Supplement: c2ay25922b.pdf [file c2ay25922b.pdf]

## Supporting Information

### **Photonic and magnetic dual responsive molecularly imprinted polymers: preparation, recognition characteristics and properties as novel sorbent for caffeine in complicated samples**

Shoufang Xu,<sup>ad</sup> Jinhua Li,<sup>a</sup> Xingliang Song,<sup>b</sup> Junshen Liu,<sup>c</sup> Hongzhi Lu,<sup>b</sup> and Lingxin Chen<sup>\*a</sup>

<sup>a</sup> Key Laboratory of Coastal Zone Environmental Processes, Yantai Institute of Coastal Zone Research, Chinese Academy of Sciences, Yantai 264003, China

<sup>b</sup> School of Chemistry & Chemical Engineering, Linyi University, Linyi 276005, China

<sup>c</sup> School of Chemistry and Materials Science, Ludong University, Yantai 264025, China

<sup>d</sup> University of Chinese Academy of Sciences, Beijing 100049, China

\*Corresponding author: Tel./Fax: +86 535 2109130.

E-mail address: lxchen@yic.ac.cn (L. Chen).

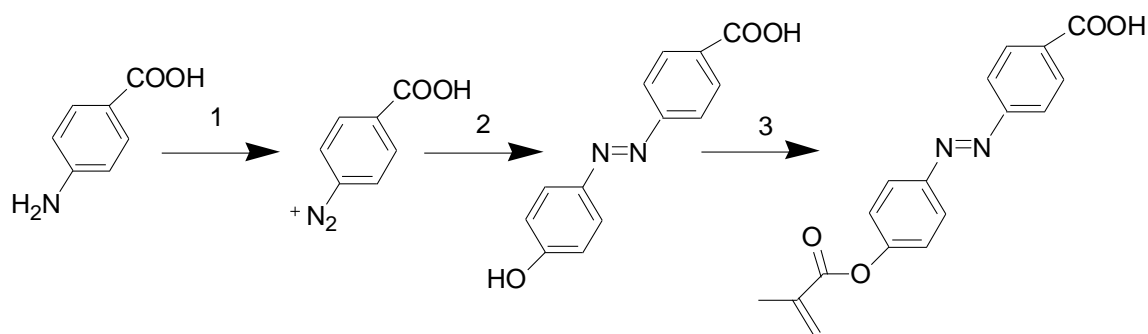

**Scheme S1.** Synthesis route for the functional monomer 4-[(4-methacryloyloxy)phenylazo]benzoic acid (MPABA). 1)  $\text{NaNO}_2$ , 5 M HCl, 0–3 °C; 2) 3 M NaOH, phenol, 0–3 °C; 3) methacrylic acid anhydride, 4-(dimethylamino)pyridine, triethylamine, 40 °C for 24 h, reflux for 2 h; dry THF.

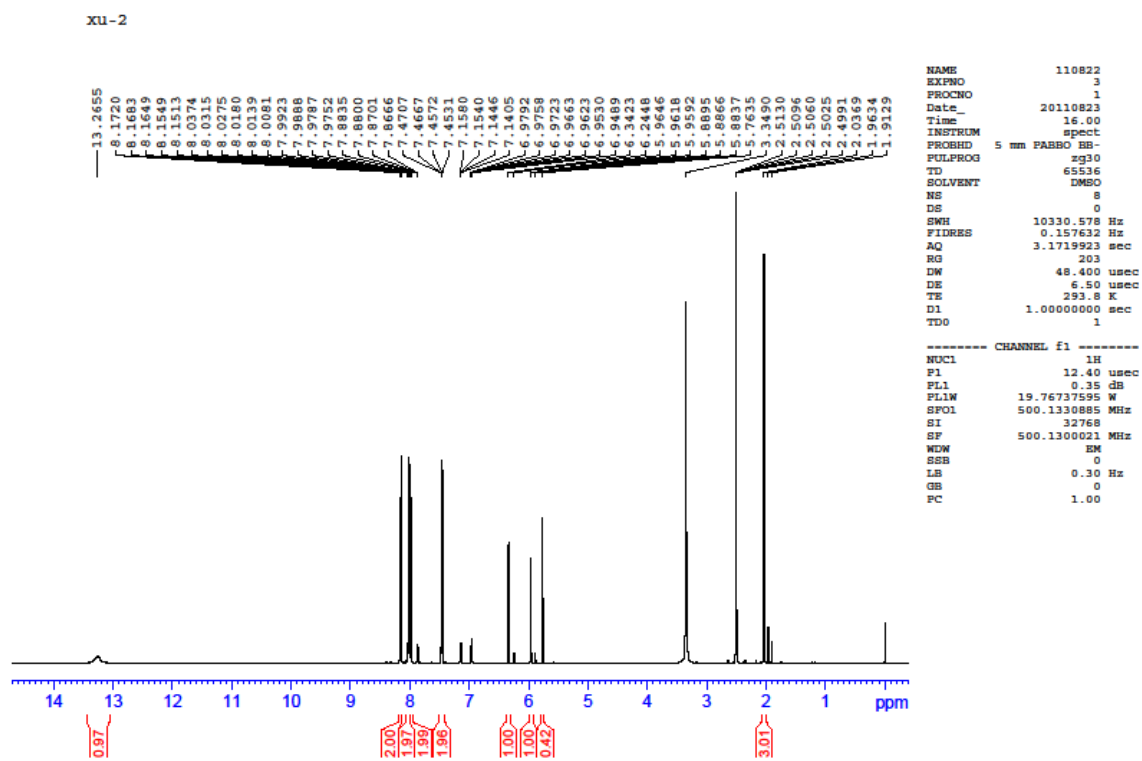

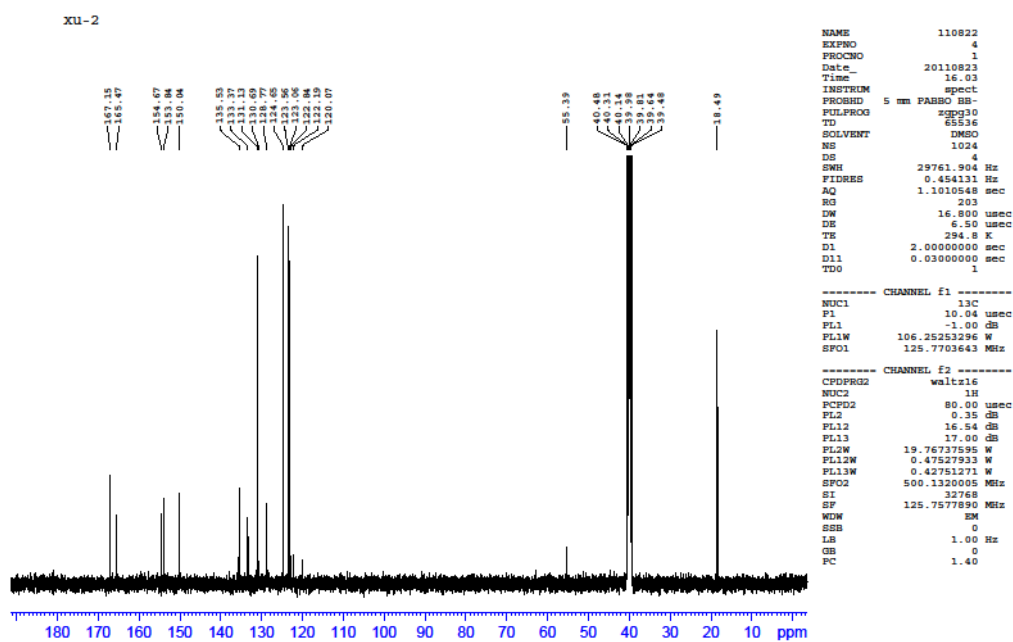

CLX-XSF-1-N\_110823100800 #10 RT: 0.14 Av: 1 NL: 4.32E4  
T: ITMS - c ESI Full ms [50.00-2000.00]

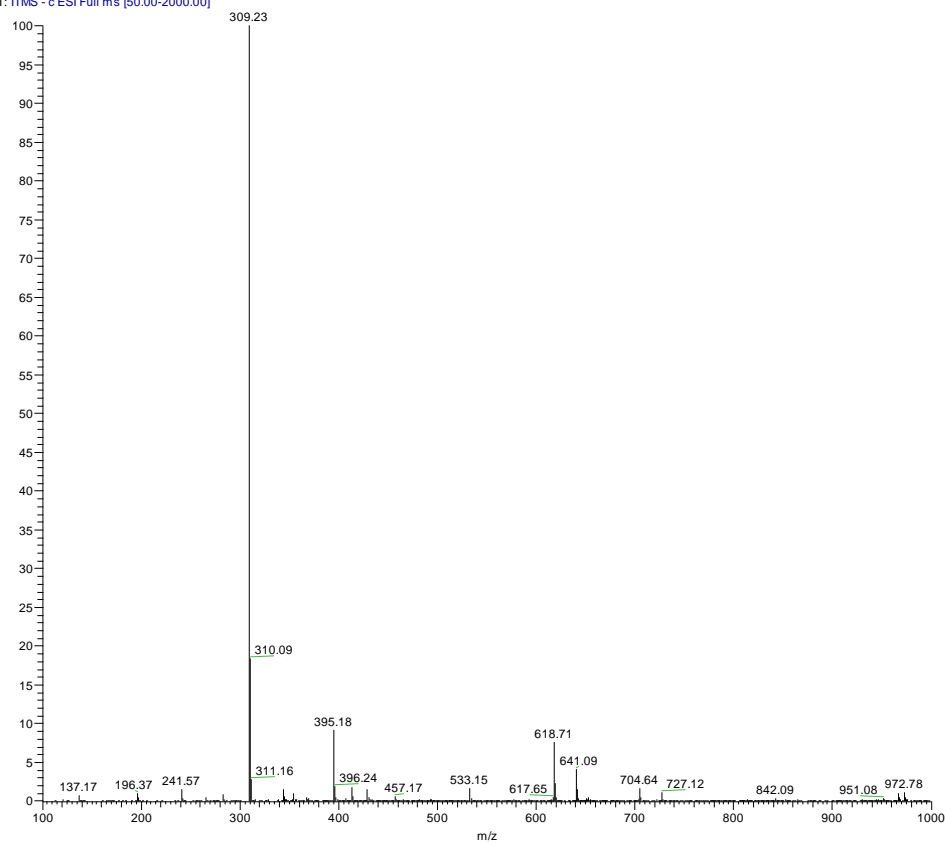

Fig. S1 H-NMR, C-NMR and MS for functional monomer MPABA.

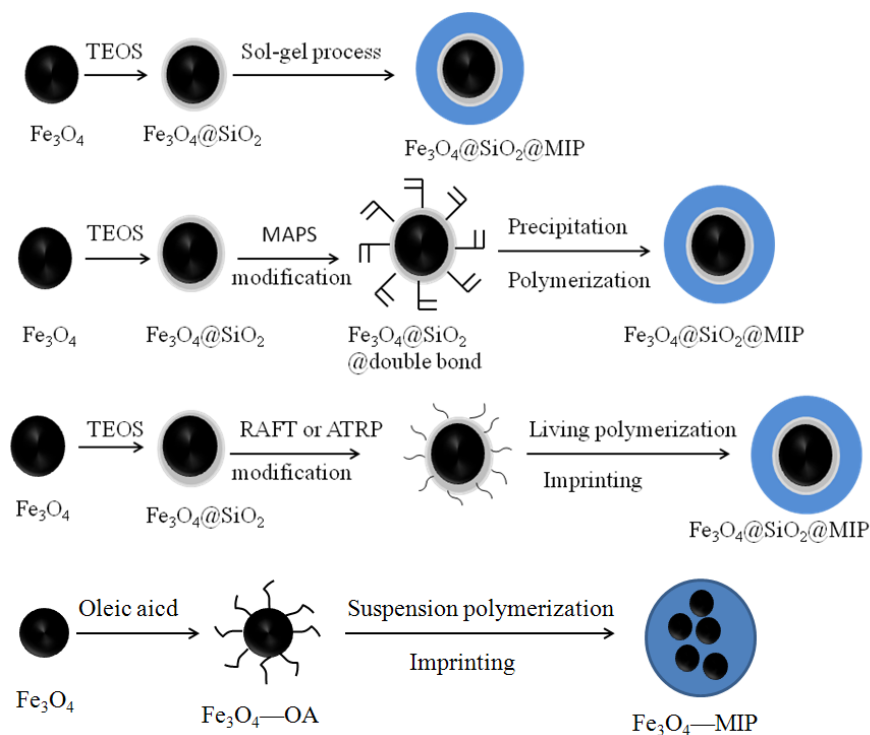

**Scheme S2.** Preparation processes for surface molecular imprinting on magnetic nanoparticles.

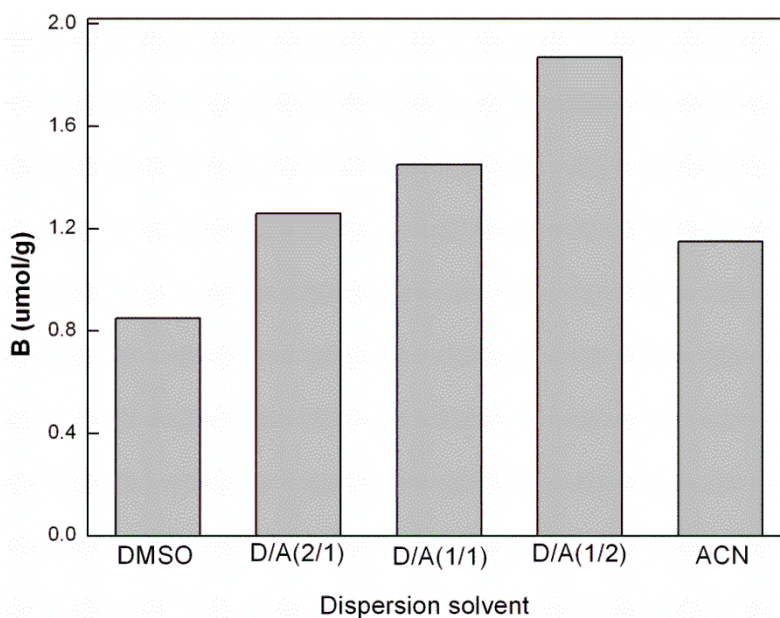

**Fig. S2** Effect of dispersion solvent on binding capacity. Experiment conditions:  $\text{Fe}_3\text{O}_4@\text{MIPs}$ , 30 mg;  $C_{\text{caffeine}}$ , 40  $\mu\text{M}$ ; 3 mL dispersion solvent; 25 °C in the dark for 12 h.
